# Supplementary material for: Multilayer SiOx derived from Si–Ca alloy via Fe2O3 oxidization for Li-ion batteries
Source: Royal Society of Chemistry journal article supplement (doi:10.1039/d4dt03439b), 2025-01-01

## Multilayer SiO<sub>x</sub> derived from Si-Ca alloy via Fe<sub>2</sub>O<sub>3</sub> oxidization for Li-ion batteries

Hanqing Dong, Hongwei Xie\*, Qiushi Song, Zhiqiang Ning

Key Laboratory for Ecological Metallurgy of Multimetallic Mineral of Ministry of Education,

School of Metallurgy, Northeastern University, Shenyang, 110819, PR China

E-mail: [xiehw@smm.neu.edu.cn](mailto:xiehw@smm.neu.edu.cn)

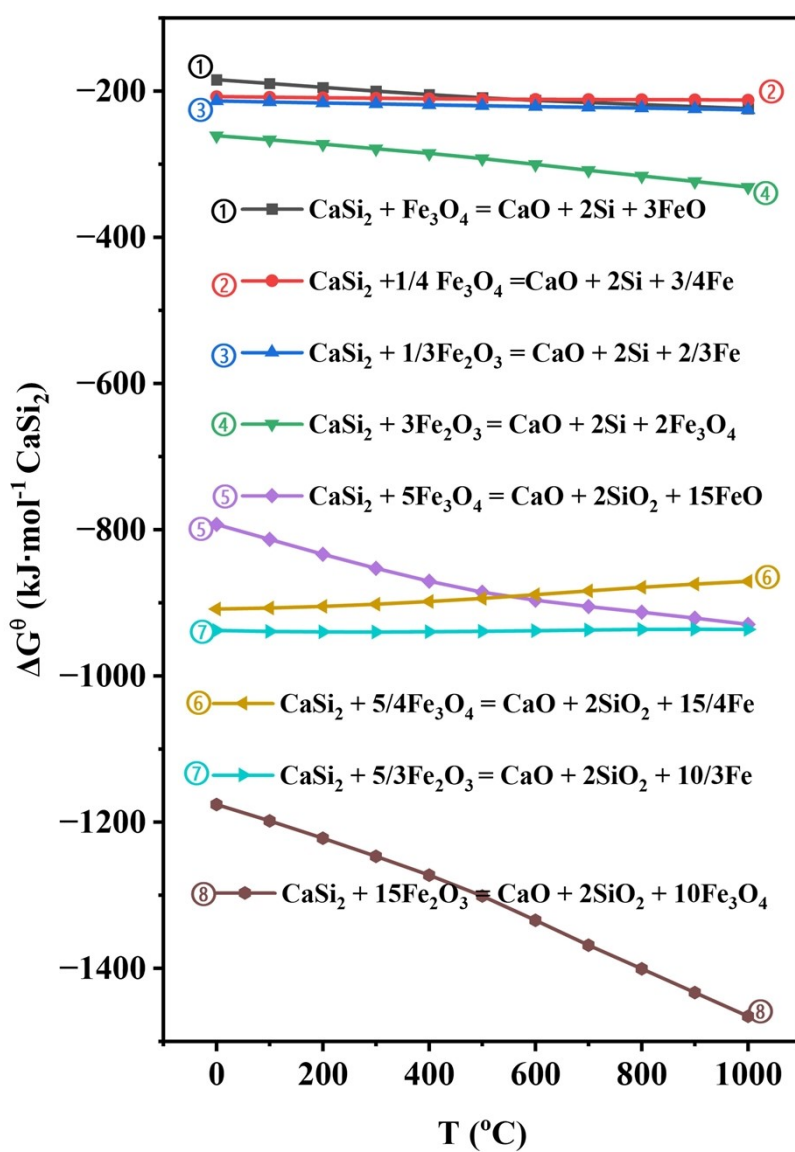

Fig. S1. Ellingham diagram of typical reactions

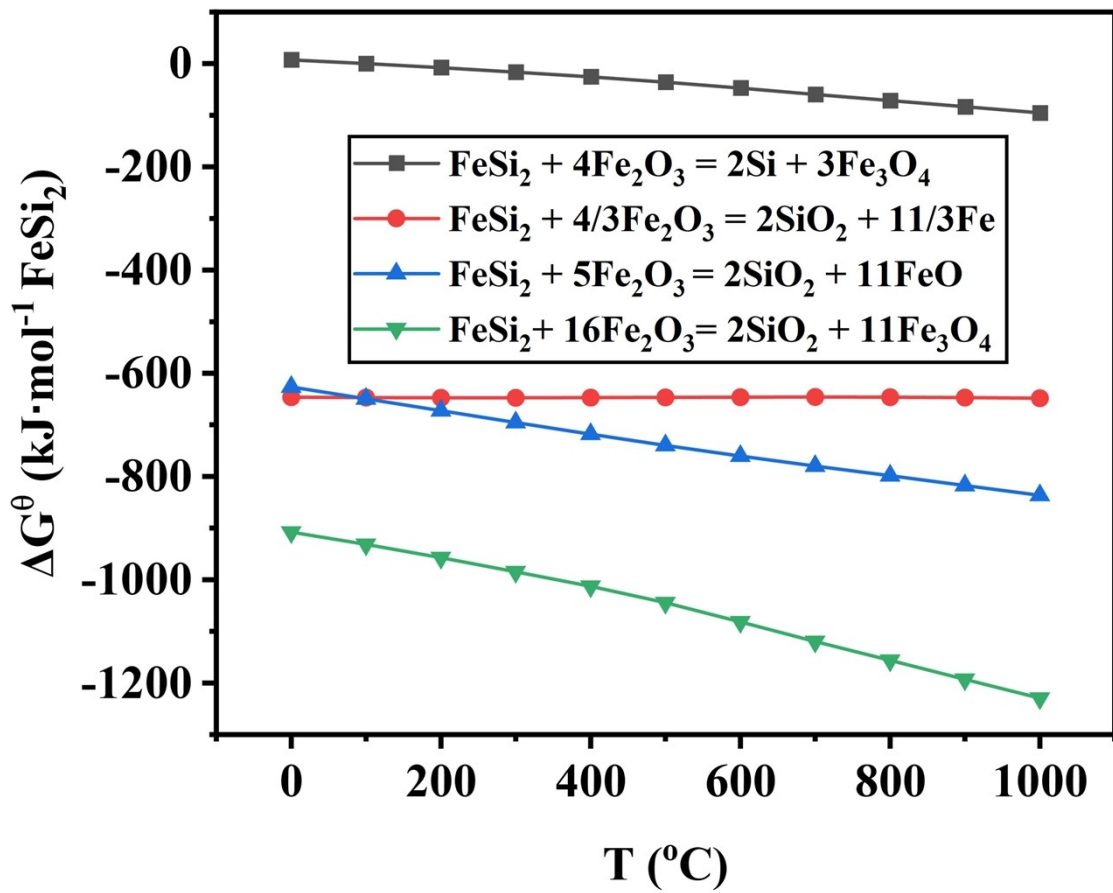

Fig. S2. Ellingham diagram of the reaction between  $\text{FeSi}_2$  and Fe oxides

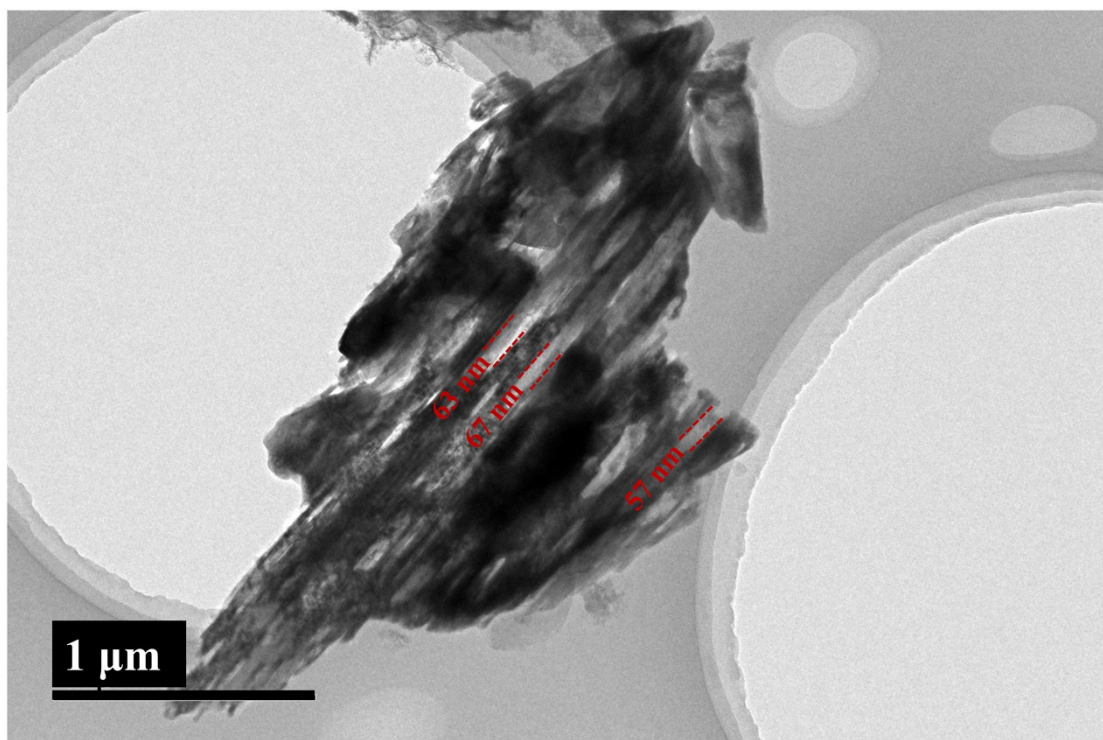

**Fig.S3** TEM image of ML-SiO<sub>x</sub>-Fe<sub>2</sub>O<sub>3</sub>

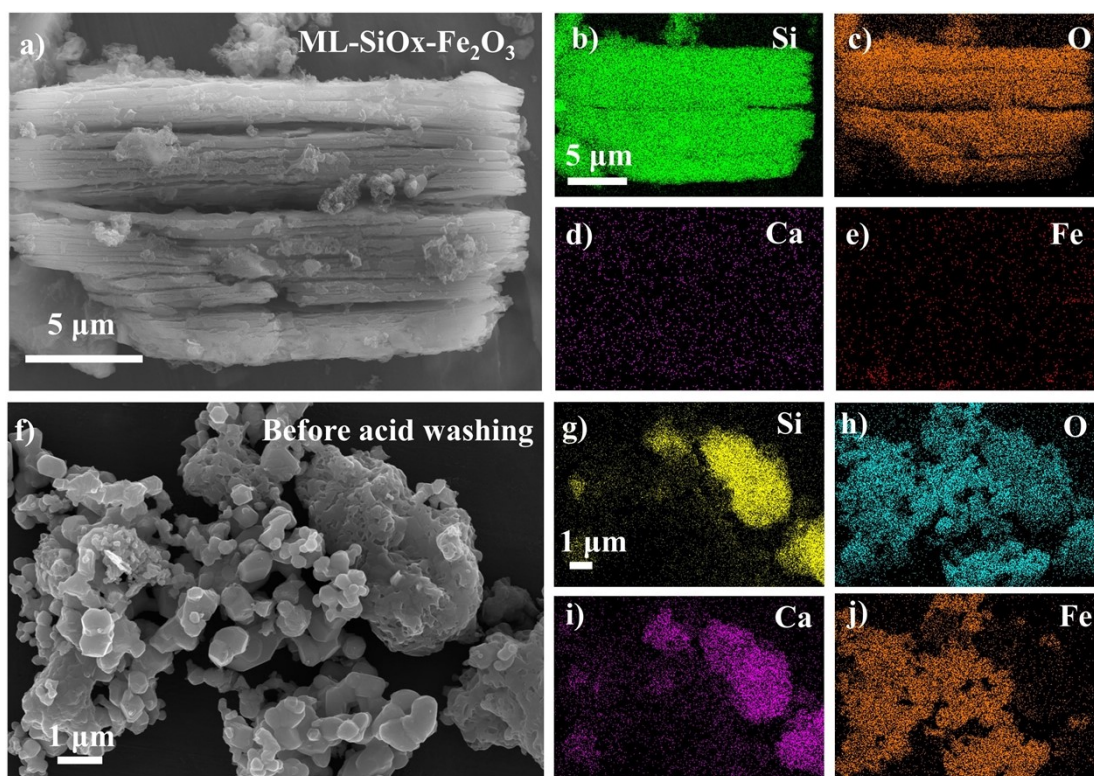

**Fig. S4.** SEM images and EDS mapping results of ML-SiO<sub>x</sub>-Fe<sub>2</sub>O<sub>3</sub> after and before acid washing

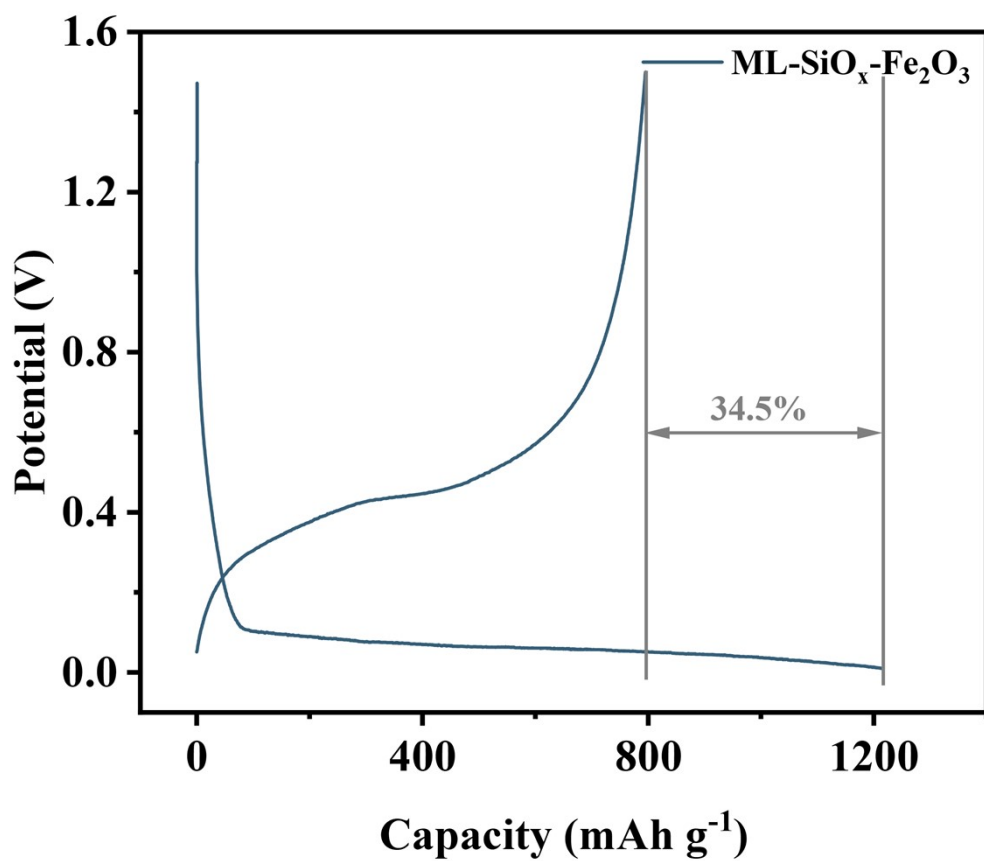

Fig. S5. Galvanostatic charge-discharge curves of ML-SiO<sub>x</sub>-Fe<sub>2</sub>O<sub>3</sub>

Fig. S6. The equivalent circuits of B-Si@SiO<sub>x</sub>/C anodes (a) two semicircles

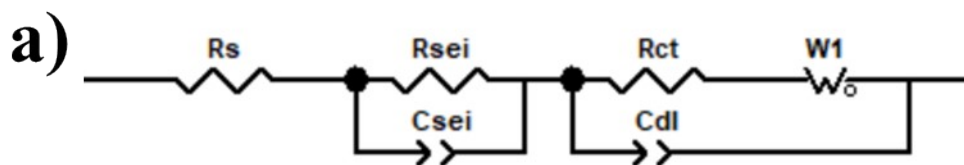

Supplement: d4dt03439b1.pdf [file d4dt03439b1.pdf]
